# Supplementary material for: Accuracy of Predicted Genomic Breeding Values in Purebred and Crossbred Pigs
Source: PubMed Central journal article supplement (PMC4528314; doi:10.1534/g3.115.018119), 2015-05-26
Supplement: supp_g3.115.018119_FileS4.pdf [file supp_g3.115.018119_FileS4.pdf]

**File S4**

**G matrix for all individuals across populations.**

Available for download at [http://figshare.com/articles/File\\_S4/1425093](http://figshare.com/articles/File_S4/1425093)
