# Supplementary material for: Accuracy of Predicted Genomic Breeding Values in Purebred and Crossbred Pigs
Source: PubMed Central journal article supplement (PMC4528314; doi:10.1534/g3.115.018119), 2015-05-26
Supplement: supp_g3.115.018119_TableS2.pdf [file supp_g3.115.018119_TableS2.pdf]

**Table S2** Estimated pedigree-based heritability ( $h^2$ ) of the deregressed estimated breeding values across traits and populations under study.

| TRAIT | Heritability (S.E.) |             |             |
|-------|---------------------|-------------|-------------|
|       | DL                  | LW          | F1          |
| AFI   | 0.27 (0.05)         | 0.22 (0.05) | 0.73 (0.16) |
| TNB   | 0.03 (0.01)         | 0.05 (0.01) | 0.09 (0.04) |
| LBW   | 0.78 (0.09)         | 0.70 (0.07) | 0.43 (0.15) |
| LVR   | 0.20 (0.04)         | 0.12 (0.03) | 0.17 (0.08) |

DL - Dutch Landrace, LW - Large White, F1 - cross between DL and LW, S.E. – standard error, AFI- age at first insemination, TNB- total number of piglets born, LBW- litter birth weight, LVR- litter variation
