# Supplementary material for: Accuracy of Predicted Genomic Breeding Values in Purebred and Crossbred Pigs
Source: PubMed Central journal article supplement (PMC4528314; doi:10.1534/g3.115.018119), 2015-05-26
Supplement: supp_g3.115.018119_TableS4.pdf [file supp_g3.115.018119_TableS4.pdf]

**Table S4 GEBV accuracies from prediction of crossbred genetic merit from purebred training data using GBLUP (scenarios 12-17) – LEAST 50% related animals between training and validation populations**

| Trait | Scenario | $r^2$ | N training |      | N prediction | Accuracy            |       |
|-------|----------|-------|------------|------|--------------|---------------------|-------|
|       |          |       | DL         | LW   | F1           | GBLUP <sup>cv</sup> | Bias* |
| AFI   | 12       | 0.45  | 1067       | 1389 | 144          | -0.18               | -2.34 |
| TNB   | 12       | 0.47  | 1066       | 1383 | 140          | 0.09                | 0.80  |
| LBW   | 12       | 0.79  | 1070       | 1385 | 143          | 0.32                | 0.66  |
| LVR   | 12       | 0.52  | 1069       | 1385 | 143          | 0.35                | 1.19  |

DL - Dutch Landrace, LW - Large White, F1 - cross between DL and LW

AFI- age at first insemination, TNB- total number of piglets born, LBW- litter birth weight, LVR- litter variation

<sup>cv</sup> - Estimate obtained by 20-random training-prediction populations

\* - Regression coefficient of the GEBV on the DEBV

$r^2$  - Mean reliability of deregressed estimated breeding values from the training population
